# Supplementary material for: CD45RC Expression of Circulating CD8+ T Cells Predicts Acute Allograft Rejection: A Cohort Study of 128 Kidney Transplant Patients
Source: MDPI journal article supplement (doi:10.3390/jcm8081147), 2019-08-01
Supplement: s1 [file s1]

**S1 Table.** Univariate analysis of factors associated with acute rejection occurrence, after exclusion of borderline AR. Comparisons between groups were done using Mann-Whitney U test for continuous variables and Khi2 or Fisher exact tests for categorical variables. Continuous variables are expressed by median with minimum to maximum values and categorical variables are expressed by their absolute count and percentage.

|                                         | Acute rejection<br>(n=22)  | No rejection<br>(n=97)*     | <i>p</i> |
|-----------------------------------------|----------------------------|-----------------------------|----------|
| <b>Baseline characteristics</b>         |                            |                             |          |
| Sex (M/F, n (%))                        | 12 (54.5)/10 (45.5)        | 62 (63.9)/35 (36.1)         | 0.413    |
| Age (years)                             | 46.6 ± 10.7                | 50.8 ± 13.3                 | 0.170    |
| <b>History of transplantation</b>       |                            |                             |          |
| Previous kidney transplantation, n (%)  | 2 (9.1)                    | 11 (11.3)                   | 1.000    |
| Pre-transplant dialysis, n (%)          | 15 (68.2)                  | 70 (72.2)                   | 0.709    |
| Donor age, years                        | 50.1 ± 13.3                | 51.0 ± 15.6                 | 0.792    |
| Cold ischemia time (hours)              | 15.4 ± 6.4                 | 17.1 ± 7.0                  | 0.361    |
| HLA mismatch (ABDR), n                  | 3.77 ± 1.3                 | 3.78 ± 1.3                  | 0.974    |
| <b>Immunosuppressive regimens</b>       |                            |                             |          |
| Induction (none/basiliximab/ATG), n (%) | 1 (4.5)/16 (72.7)/5 (22.7) | 4 (4.1)/49 (50.5)/44 (45.4) | 0.145    |
| Tacrolimus-based regimen, n (%)         | 16 (72.7)                  | 78 (80.4)                   | 0.370    |

\* Patients with borderline AR were excluded from analysis.

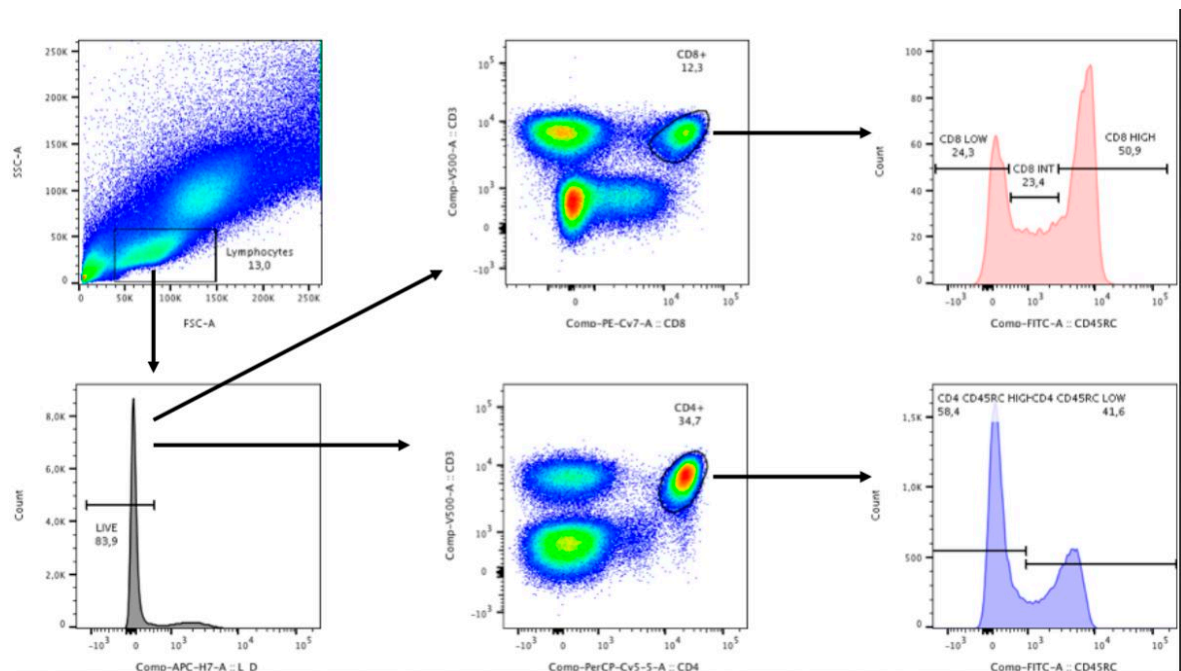

Figure S1. Representative experiment showing the cytometry gating strategy.

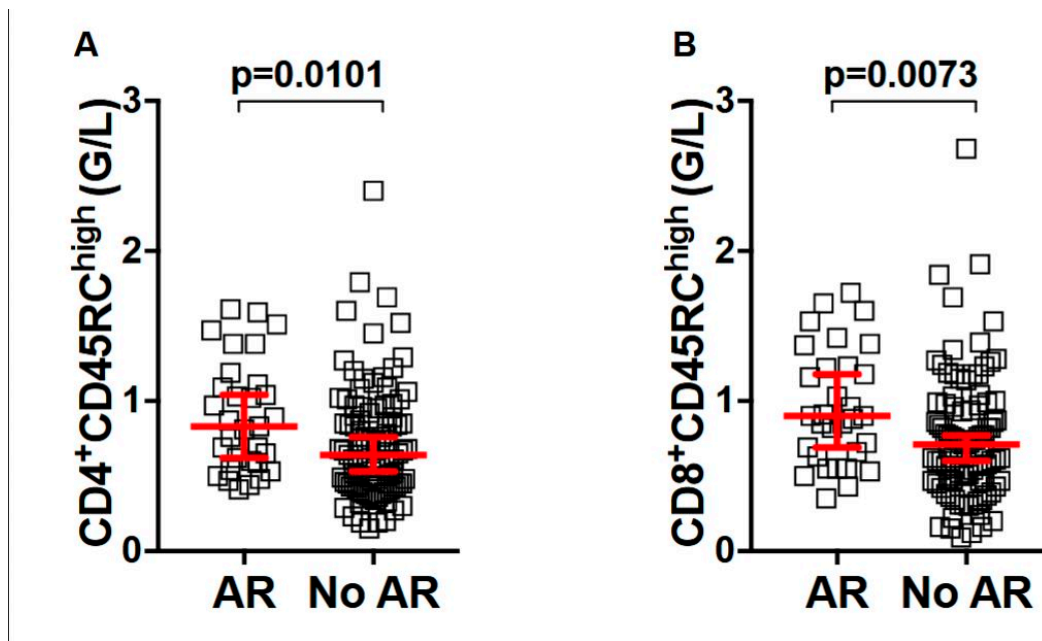

Figure S2. Absolute number of CD4<sup>+</sup> and CD8<sup>+</sup> CD45RC<sup>high</sup> T cells according to AR occurrence.

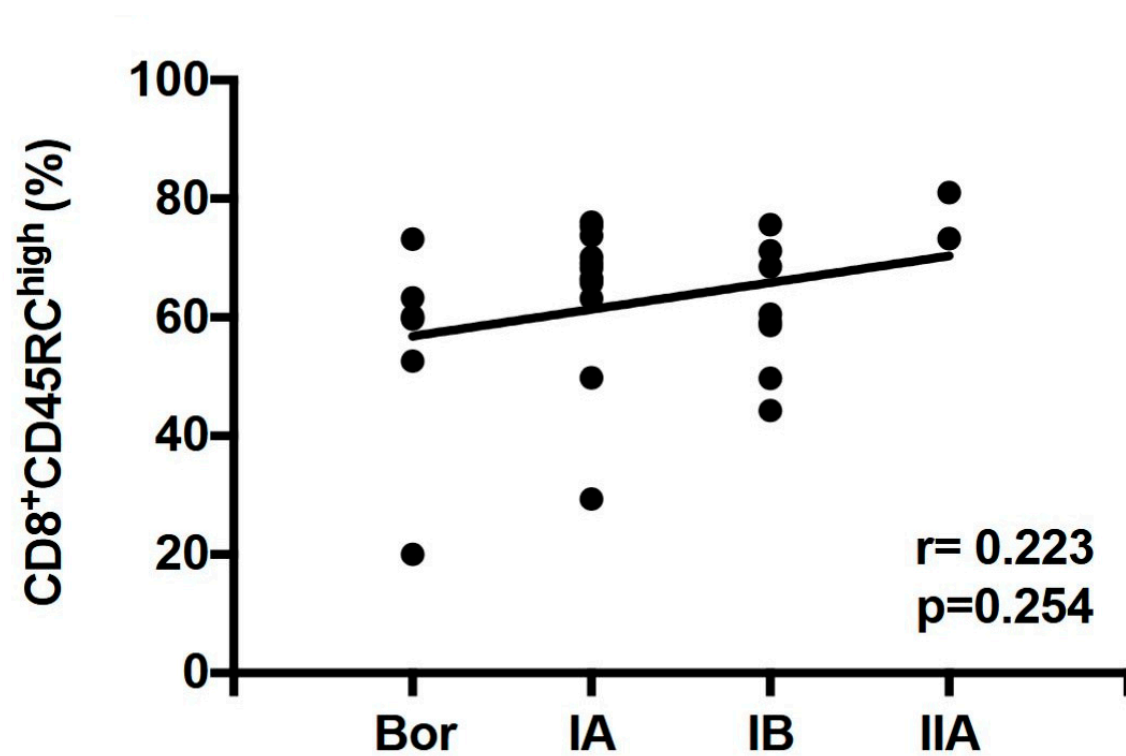

Figure S3. Correlation between CD8<sup>+</sup> CD45RC<sup>high</sup> T cell proportion and the severity of TCMR. The correlation was analyzed using Spearman's test.
